# Supplementary material for: How Molecular Topology Can Help in Amyotrophic Lateral Sclerosis (ALS) Drug Development: A Revolutionary Paradigm for a Merciless Disease
Source: MDPI journal article supplement (doi:10.3390/ph15010094), 2022-01-14
Supplement: s1 [file s1]

## Molecular topology may bring some hope in amyotrophic lateral sclerosis (ALS) treatment development. A revolutionary paradigm for a ruthless disease

Maria Galvez-Llompert<sup>1</sup>, Riccardo Zanni<sup>2</sup>, Ramon Garcia-Domenech<sup>2</sup>, Jorge Galvez<sup>2\*</sup>

<sup>1</sup>*Instituto de Tecnología Química, UPV-CSIC, Universidad Politécnica de Valencia, Valencia, Spain. E-mail: [magllo@itq.upv.es](mailto:magllo@itq.upv.es)*

<sup>2\*</sup>*Molecular Topology and Drug Design Unit, Department of Physical Chemistry, University of Valencia, Valencia, Spain. E-mail: [jorge.galvez@uv.es](mailto:jorge.galvez@uv.es)*

### Supplementary Material

**Table S1.** Descriptors and DF<sub>GEN</sub> value, probability of being classified as active by the model and after LOO internal validation procedure.

| Compound              | MeanDD | X3A   | VE2sign_D | MATS5m | Prob(activ) | DF <sub>GEN</sub> | Prob(activ) <sub>LOO</sub> |
|-----------------------|--------|-------|-----------|--------|-------------|-------------------|----------------------------|
| <b>Active group</b>   |        |       |           |        |             |                   |                            |
| Edaravone             | 6.000  | 0.185 | 0.005     | -0.405 | 0.994       | 5.075             | 0.972                      |
| Kopal                 | 9.882  | 0.177 | 0.001     | -0.215 | 1.000       | 9.590             | 1.000                      |
| Masitinib             | 11.680 | 0.189 | 0.003     | 0.170  | 0.996       | 5.608             | 0.936                      |
| Riluzole              | 7.229  | 0.175 | 0.006     | -0.369 | 0.985       | 4.161             | 0.967                      |
| Telbivudine           | 6.441  | 0.185 | 0.003     | 0.027  | 0.135       | -1.854            | 0.967                      |
| Tirasemtiv            | 7.537  | 0.176 | 0.001     | -0.155 | 0.975       | 3.656             | 0.961                      |
| <b>Inactive group</b> |        |       |           |        |             |                   |                            |
| Cilutazoline          | 7.022  | 0.183 | 0.010     | -0.113 | 0.039       | -3.211            | 0.057                      |
| Cotinine              | 6.013  | 0.191 | 0.005     | 0.127  | 0.003       | -5.753            | 0.004                      |
| Fludorex              | 5.392  | 0.192 | 0.006     | -0.034 | 0.024       | -3.698            | 0.032                      |
| Fluminorex            | 6.100  | 0.186 | 0.001     | 0.102  | 0.070       | -2.579            | 0.027                      |
| Gacyclidine           | 6.902  | 0.168 | 0.005     | -0.224 | 0.467       | -0.131            | 0.651                      |
| Iproclozide           | 5.767  | 0.222 | 0.005     | 0.204  | 0.034       | -3.341            | 0.108                      |
| Methisazone           | 7.758  | 0.178 | 0.017     | -0.106 | 0.001       | -7.532            | 0.000                      |
| Panidazole            | 6.853  | 0.191 | 0.009     | 0.127  | 0.002       | -6.490            | 0.002                      |
| Pemoline              | 6.000  | 0.185 | 0.005     | -0.093 | 0.156       | -1.683            | 0.182                      |
| Rufinamide            | 6.779  | 0.191 | 0.006     | 0.102  | 0.018       | -4.024            | 0.023                      |
| Sulbactam             | 5.990  | 0.154 | 0.009     | -0.148 | 0.000       | -7.956            | 0.000                      |
| Triclofos             | 2.822  | 0.232 | 0.000     | 0.414  | 0.000       | -8.203            | 0.000                      |
| Uridine               | 6.449  | 0.183 | 0.002     | 0.032  | 0.100       | -2.195            | 0.140                      |

red colour: misclassified compounds by the model.

**Table S2.** Descriptors and DF<sub>CLIN</sub> value, probability of being classified as active by the model and after LOO internal validation procedure.

| Compound              | SM1_Dz(p) | ATSC3m  | ATSC8m  | MATS5e | P.A.  | DF <sub>CLIN</sub> | P.A. <sub>LOO</sub> |
|-----------------------|-----------|---------|---------|--------|-------|--------------------|---------------------|
| <b>Active group</b>   |           |         |         |        |       |                    |                     |
| Edaravone             | -1.224    | 10.600  | 3.198   | -0.437 | 0.700 | 0.848              | 0.416               |
| Kopal                 | -2.568    | 16.180  | 22.678  | -0.303 | 0.985 | 4.170              | 0.978               |
| Masitinib             | -2.153    | 36.928  | 27.510  | -0.015 | 0.908 | 2.286              | 0.719               |
| Riluzole              | -2.244    | 6.777   | 0.393   | -0.498 | 0.999 | 6.786              | 0.999               |
| Telbivudine           | -2.104    | 19.021  | 9.363   | -0.087 | 0.910 | 2.317              | 0.869               |
| Tirasemtiv            | -1.526    | 15.494  | 6.382   | -0.243 | 0.678 | 0.747              | 0.623               |
| <b>Inactive group</b> |           |         |         |        |       |                    |                     |
| Bromocriptine         | -2.259    | 61.361  | 81.203  | -0.042 | 0.175 | -1.553             | 0.205               |
| Ceftriaxone           | -2.567    | 18.986  | 36.936  | -0.109 | 0.466 | -0.137             | 0.614               |
| Celecoxib             | -2.419    | 15.813  | 21.162  | -0.023 | 0.587 | 0.353              | 0.671               |
| Coenzyme_Q10          | -1.758    | 76.808  | 97.011  | -0.004 | 0.014 | -4.286             | 0.015               |
| Creatine              | -1.649    | 7.914   | 0.000   | 0.257  | 0.008 | -4.814             | 0.008               |
| Dextromethorphan      | -1.030    | 30.612  | 14.058  | 0.053  | 0.030 | -3.467             | 0.036               |
| Diazoxide             | -1.390    | 10.048  | 5.076   | -0.044 | 0.038 | -3.242             | 0.042               |
| Erythropoietin        | -1.536    | 24.388  | 31.665  | -0.045 | 0.014 | -4.282             | 0.015               |
| Gacyclidine           | -0.188    | 31.842  | 8.624   | -0.192 | 0.019 | -3.924             | 0.022               |
| Guanabenz             | -1.103    | 9.340   | 15.024  | -0.052 | 0.001 | -6.756             | 0.001               |
| IGF-1                 | -3.515    | 151.457 | 233.752 | 0.104  | 0.005 | -5.276             | 0.000               |
| Lamotrigine           | -1.285    | 10.082  | 7.267   | -0.163 | 0.055 | -2.853             | 0.063               |
| Malondialdehyde       | -1.224    | 3.741   | 0.000   | 0.000  | 0.006 | -5.097             | 0.006               |
| Memantine             | -0.470    | 26.516  | 0.000   | -0.640 | 0.962 | 3.222              | 1.000               |
| Minocycline           | -2.416    | 32.944  | 40.940  | -0.041 | 0.644 | 0.592              | 0.706               |
| Nimesulide            | -2.055    | 14.355  | 16.269  | 0.198  | 0.027 | -3.569             | 0.032               |
| N-methyl-D-aspartate  | -1.856    | 10.003  | 0.000   | 0.249  | 0.042 | -3.131             | 0.053               |
| Olesoxime             | -1.030    | 51.467  | 43.298  | 0.014  | 0.019 | -3.925             | 0.022               |
| Pioglitazone          | -1.688    | 26.799  | 16.603  | 0.015  | 0.316 | -0.772             | 0.370               |
| Pramipexole           | -0.878    | 22.226  | 8.248   | 0.038  | 0.008 | -4.879             | 0.008               |
| Pyrimethamine         | -1.165    | 15.400  | 12.599  | -0.343 | 0.220 | -1.265             | 0.282               |
| Resveratrol           | -1.526    | 12.386  | 8.006   | -0.137 | 0.187 | -1.473             | 0.199               |
| Talampanel            | -1.856    | 21.748  | 26.354  | -0.076 | 0.145 | -1.772             | 0.156               |
| TCH346                | -1.030    | 17.725  | 15.741  | -0.026 | 0.003 | -5.728             | 0.003               |
| Valproic_acid         | -1.224    | 13.105  | 1.285   | -0.153 | 0.182 | -1.502             | 0.195               |
| Vitamin_D             | -0.788    | 45.597  | 45.194  | 0.019  | 0.001 | -6.949             | 0.001               |
| Xaliproden            | -2.083    | 25.502  | 25.363  | 0.029  | 0.325 | -0.729             | 0.360               |

red colour: misclassified compounds by the model.

**Table S3.** Descriptors and DF<sub>TDP43</sub>'s value, probability of being classified as active by the model.

| Compound                                                                        | VE1sign_Dz(p) | DISPe | J_G    | DF <sub>TDP43</sub> | Class. | P.A.  |
|---------------------------------------------------------------------------------|---------------|-------|--------|---------------------|--------|-------|
| <b>Active</b>                                                                   |               |       |        |                     |        |       |
| Arcyriaflavin A                                                                 | 0             | 0.115 | 2.217  | 2.61                | A      | 0.932 |
| Berberine                                                                       | 0.098         | 0.119 | 1.678  | 2.59                | A      | 0.93  |
| Bosutinib                                                                       | 0.665         | 0.404 | 1.963  | 2.031               | A      | 0.884 |
| CHC                                                                             | 0.082         | 0.17  | 2.479  | 2.467               | A      | 0.922 |
| Furomazine                                                                      | 0.338         | 0.082 | 3.318  | -1.23               | I      | 0.226 |
| Ibacinabine                                                                     | 0.281         | 0.038 | 2.654  | -0.684              | I      | 0.335 |
| Idoxuridine                                                                     | 0.276         | 0.128 | 3.001  | 0.088               | A      | 0.522 |
| IGS-2,7                                                                         | 0.082         | 0.17  | 2.479  | 2.467               | A      | 0.922 |
| KPT 335                                                                         | 0.419         | 0.607 | 2.961  | 5.096               | A      | 0.994 |
| LND-0130436                                                                     | 0.152         | 0.154 | 4.293  | -0.157              | I      | 0.461 |
| Olomoucine                                                                      | 0.114         | 0.176 | 2.144  | 2.686               | A      | 0.936 |
| Panipenam                                                                       | 0.122         | 0.193 | 3.45   | 1.439               | A      | 0.808 |
| PHA767491                                                                       | 0.046         | 0.069 | 3.027  | 0.864               | A      | 0.704 |
| Pioglitazone                                                                    | 0.178         | 0.289 | 3.109  | 2.617               | A      | 0.932 |
| SB 415286                                                                       | 0.193         | 0.13  | 3.436  | 0.189               | A      | 0.547 |
| SB216763                                                                        | 0.009         | 0.316 | 2.013  | 5.261               | A      | 0.995 |
| 3-((6,7-dimethoxyquinazolin-4-yl)amino)phenol                                   | 0.048         | 0.062 | 3.237  | 0.539               | A      | 0.632 |
| Tropapride                                                                      | 0.006         | 0.117 | 2.946  | 1.811               | A      | 0.86  |
| Vorinostat                                                                      | 0.243         | 0.298 | 3.535  | 1.831               | A      | 0.862 |
| <b>Inactive</b>                                                                 |               |       |        |                     |        |       |
| 4-carbamoyl-2'-hydroxyiminomethyl-1,1'-oxidimethylenedi(pyr idinium) dichloride | 0.027         | 0.086 | 4.125  | 0.019               | A      | 0.505 |
| Amphotericin B                                                                  | 0.028         | 0.125 | 10.728 | -6.644              | I      | 0.001 |
| Clometacin                                                                      | 0.335         | 0.09  | 3.344  | -1.143              | I      | 0.242 |
| Cloxypendyl                                                                     | 0.645         | 0.081 | 3.24   | -3.207              | I      | 0.039 |
| Fipronil                                                                        | 0.168         | 0.096 | 3.982  | -0.646              | I      | 0.344 |
| Flumetroxone-17-acetate                                                         | 0.286         | 0.187 | 4.176  | -0.519              | I      | 0.373 |

|             |       |       |       |        |   |       |
|-------------|-------|-------|-------|--------|---|-------|
| Fluperamide | 0.313 | 0.33  | 4.471 | 0.753  | A | 0.680 |
| Maduramicin | 0.025 | 0.077 | 5.099 | -1.138 | I | 0.243 |
| Metibride   | 0.34  | 0.145 | 3.01  | -0.14  | I | 0.465 |
| Mizolastine | 0.354 | 0.028 | 2.978 | -1.649 | I | 0.161 |
| Nelzarabine | 0.281 | 0.076 | 2.174 | 0.299  | A | 0.574 |
| Oxazafone   | 0.637 | 0.066 | 4.545 | -4.748 | I | 0.009 |
| Parconazole | 0.674 | 0.037 | 3.06  | -3.758 | I | 0.023 |
| Perfomedil  | 0.219 | 0.16  | 4.862 | -1.144 | I | 0.242 |
| Pipobroman  | 0     | 0     | 4.85  | -1.647 | I | 0.162 |
| Pirifibrate | 0.025 | 0.032 | 3.532 | 0.003  | A | 0.501 |
| Pivoxazepam | 0.626 | 0.096 | 3.196 | -2.847 | I | 0.055 |
| Sertindole  | 0.611 | 0.05  | 3.347 | -3.489 | I | 0.03  |
| Temelastine | 0.101 | 0.046 | 3.789 | -0.607 | I | 0.353 |
| Thioinosine | 0.32  | 0.063 | 2.33  | -0.288 | I | 0.429 |
| Tiaramide   | 0.438 | 0.105 | 3.453 | -1.761 | I | 0.147 |
| Tilorone    | 0     | 0.064 | 4.939 | -0.953 | I | 0.278 |
| Uldazepam   | 0.99  | 0.054 | 2.938 | -5.516 | I | 0.004 |
| Vinconate   | 0.568 | 0.178 | 2.146 | -0.324 | I | 0.42  |

---

**Table S4.** LSO internal validation procedure for DF<sub>TDP43</sub> (1=training active group; 2=training inactive group; 3=test active group; 4=test inactive group).

| Compound                                                                       | Class.<br>DF <sub>TDP43</sub> | P.A.  | Class.<br>LSO1 | P.A.<br>LSO1 | Class.<br>LSO2 | P.A.<br>LSO2 | Class.<br>LSO3 | P.A.<br>LSO3 | Class.<br>LSO4 | P.A.<br>LSO4 |
|--------------------------------------------------------------------------------|-------------------------------|-------|----------------|--------------|----------------|--------------|----------------|--------------|----------------|--------------|
| Arcyriaflavin A                                                                | 1                             | 0.932 | 1              | 0.954        | 1              | 0.928        | 1              | 0.989        | 3              | 0.884        |
| Berberine                                                                      | 1                             | 0.930 | 3              | 0.952        | 1              | 0.921        | 1              | 0.993        | 1              | 0.877        |
| Bosutinib                                                                      | 1                             | 0.884 | 1              | 0.768        | 3              | 0.919        | 1              | 0.968        | 1              | 0.850        |
| CHC                                                                            | 1                             | 0.922 | 1              | 0.935        | 1              | 0.927        | 3              | 0.980        | 1              | 0.879        |
| Furomazine                                                                     | 1                             | 0.226 | 1              | 0.322        | 3              | 0.141        | 1              | 0.200        | 1              | 0.221        |
| Ibacinabine                                                                    | 1                             | 0.335 | 1              | 0.497        | 1              | 0.203        | 3              | 0.516        | 1              | 0.292        |
| Idoxuridine                                                                    | 1                             | 0.522 | 1              | 0.600        | 1              | 0.442        | 1              | 0.619        | 3              | 0.476        |
| IGS-2,7                                                                        | 1                             | 0.922 | 1              | 0.935        | 1              | 0.927        | 1              | 0.980        | 3              | 0.879        |
| KPT 335                                                                        | 1                             | 0.994 | 3              | 0.971        | 1              | 0.999        | 1              | 0.997        | 1              | 0.991        |
| LND-0130436                                                                    | 1                             | 0.461 | 1              | 0.520        | 1              | 0.435        | 1              | 0.232        | 3              | 0.461        |
| Olomoucine                                                                     | 1                             | 0.936 | 1              | 0.946        | 1              | 0.940        | 3              | 0.989        | 1              | 0.895        |
| Panipenam                                                                      | 1                             | 0.808 | 1              | 0.823        | 3              | 0.824        | 1              | 0.829        | 1              | 0.767        |
| PHA767491                                                                      | 1                             | 0.704 | 1              | 0.811        | 1              | 0.635        | 1              | 0.824        | 3              | 0.632        |
| Pioglitazone                                                                   | 1                             | 0.932 | 1              | 0.911        | 1              | 0.955        | 3              | 0.961        | 1              | 0.907        |
| SB 415286                                                                      | 1                             | 0.547 | 1              | 0.627        | 3              | 0.489        | 1              | 0.541        | 1              | 0.510        |
| SB216763                                                                       | 1                             | 0.995 | 1              | 0.993        | 1              | 0.998        | 3              | 0.999        | 1              | 0.989        |
| 3-((6,7-dimethoxyquinazolin-4-yl)amino)phenol                                  | 1                             | 0.632 | 1              | 0.762        | 3              | 0.548        | 1              | 0.718        | 1              | 0.567        |
| Tropapride                                                                     | 1                             | 0.860 | 3              | 0.903        | 1              | 0.851        | 1              | 0.938        | 1              | 0.803        |
| Vorinostat                                                                     | 1                             | 0.862 | 3              | 0.817        | 1              | 0.902        | 1              | 0.854        | 1              | 0.836        |
| 4-carbamoyl-2'-hydroxyiminomethyl-1,1'-oxidimethylenedi(pyridinium) dichloride | 2                             | 0.505 | 4              | 0.634        | 2              | 0.444        | 2              | 0.339        | 2              | 0.481        |
| Amphotericin b                                                                 | 2                             | 0.001 | 2              | 0.002        | 2              | 0.001        | 4              | 0.000        | 2              | 0.005        |
| Clometacin                                                                     | 2                             | 0.242 | 2              | 0.334        | 2              | 0.156        | 2              | 0.211        | 4              | 0.236        |
| Cloxypendyl                                                                    | 2                             | 0.039 | 2              | 0.058        | 4              | 0.016        | 2              | 0.023        | 2              | 0.047        |
| Fipronil                                                                       | 2                             | 0.344 | 2              | 0.455        | 4              | 0.269        | 2              | 0.203        | 2              | 0.339        |
| Flumedroxone-17-acetate                                                        | 2                             | 0.373 | 2              | 0.393        | 2              | 0.346        | 4              | 0.169        | 2              | 0.386        |
| Fluperamide                                                                    | 2                             | 0.680 | 2              | 0.568        | 4              | 0.765        | 2              | 0.355        | 2              | 0.691        |
| Maduramicin                                                                    | 2                             | 0.243 | 2              | 0.360        | 2              | 0.192        | 2              | 0.044        | 4              | 0.269        |
| Metibride                                                                      | 2                             | 0.465 | 2              | 0.525        | 2              | 0.387        | 4              | 0.440        | 2              | 0.430        |
| Mizolastine                                                                    | 2                             | 0.161 | 4              | 0.278        | 2              | 0.079        | 2              | 0.190        | 2              | 0.153        |
| Nelzarabine                                                                    | 2                             | 0.574 | 2              | 0.695        | 2              | 0.445        | 4              | 0.846        | 2              | 0.490        |
| Oxazafone                                                                      | 2                             | 0.009 | 2              | 0.014        | 2              | 0.003        | 4              | 0.001        | 2              | 0.014        |
| Parconazole                                                                    | 2                             | 0.023 | 2              | 0.041        | 2              | 0.008        | 2              | 0.015        | 4              | 0.028        |
| Perfomedil                                                                     | 2                             | 0.242 | 2              | 0.280        | 2              | 0.213        | 2              | 0.047        | 4              | 0.276        |
| Pipobroman                                                                     | 2                             | 0.162 | 2              | 0.314        | 2              | 0.098        | 4              | 0.035        | 2              | 0.177        |
| Pirifibrate                                                                    | 2                             | 0.501 | 4              | 0.678        | 2              | 0.391        | 2              | 0.507        | 2              | 0.452        |
| Pivoxazepam                                                                    | 2                             | 0.055 | 4              | 0.078        | 2              | 0.025        | 2              | 0.036        | 2              | 0.064        |

|             |   |       |   |       |   |       |   |       |   |       |
|-------------|---|-------|---|-------|---|-------|---|-------|---|-------|
| Sertindole  | 2 | 0.030 | 2 | 0.051 | 2 | 0.011 | 2 | 0.015 | 4 | 0.036 |
| Temelastine | 2 | 0.353 | 4 | 0.416 | 2 | 0.253 | 2 | 0.264 | 2 | 0.333 |
| Thioinosine | 2 | 0.429 | 4 | 0.470 | 2 | 0.288 | 2 | 0.698 | 2 | 0.366 |
| Tiamide     | 2 | 0.147 | 2 | 0.200 | 4 | 0.087 | 2 | 0.097 | 2 | 0.155 |
| Tilorone    | 2 | 0.278 | 2 | 0.417 | 2 | 0.219 | 2 | 0.065 | 4 | 0.296 |
| Uldazepam   | 2 | 0.004 | 2 | 0.006 | 4 | 0.001 | 2 | 0.002 | 2 | 0.006 |
| Vinconate   | 2 | 0.420 | 2 | 0.437 | 4 | 0.323 | 2 | 0.680 | 2 | 0.376 |

---

red colour: misclassified compounds by the model.

**Table S5.** Virtual screening of Drugbank database: selection of potential anti-ALS determined by MT strategy. Highlight in grey compounds fulfilling all three models.

| Compound            | DF <sub>GEN</sub> | Class | P.A.  | DF <sub>CLIN</sub> | Class | P.A.  | DF <sub>TDP43</sub> | Class | P.A.   |
|---------------------|-------------------|-------|-------|--------------------|-------|-------|---------------------|-------|--------|
| 9Methylguanine      | 11.369            | A     | 1.000 | 2.217              | A     | 0.902 | 1.05                | A     | 0.870  |
| Alpiropride         | -3.082            | I     | 0.044 | 1.336              | A     | 0.792 | -1.914              | I     | 0.129  |
| Amosulalol          | 4.713             | A     | 0.991 | 2.344              | A     | 0.913 | -2.977              | I     | 0.049  |
| Arimoclomol         | 3.453             | A     | 0.969 | 0.364              | A     | 0.590 | 1.904               | A     | 0.870  |
| Arzoxifene          | 2.319             | A     | 0.910 | -1.503             | I     | 0.182 | -3.040              | I     | 0.046  |
| Atrimustine         | 18.545            | A     | 1.000 | 3.675              | A     | 0.975 | -2.213              | I     | 0.099  |
| Balaperidone        | 6.004             | A     | 0.998 | 0.580              | A     | 0.641 | 0.671               | A     | 0.662  |
| Couroupitine A      | 15.179            | A     | 1.000 | -0.852             | I     | 0.299 | 3.126               | A     | 0.958  |
| Doconazole          | 0.498             | A     | 0.621 | -1.916             | I     | 0.128 | 1.218               | A     | 0.772  |
| Dotarizine          | 5.400             | A     | 0.995 | -2.465             | I     | 0.078 | 0.021               | I     | 0.505  |
| Dutasteride         | 13.278            | A     | 1.000 | 3.412              | A     | 0.968 | 0.998               | A     | 0.731  |
| EGCG                | 6.849             | A     | 0.999 | 1.088              | A     | 0.748 | 4.051               | A     | 0.983  |
| Etamestrol          | 13.257            | A     | 1.000 | 0.390              | A     | 0.596 | -2.446              | I     | 0.080  |
| Etoprine            | 2.597             | A     | 0.931 | -1.871             | I     | 0.133 | 0.544               | A     | 0.633  |
| Fenfluthrin         | -0.600            | I     | 0.354 | 2.762              | A     | 0.941 | 2.542               | A     | 0.927  |
| Formycin            | 1.268             | A     | 0.780 | 1.381              | A     | 0.799 | -0.920              | I     | 0.285  |
| Fuprazole           | 6.527             | A     | 0.999 | -1.939             | I     | 0.126 | -1.074              | I     | 0.255  |
| Halometasone        | 12.007            | A     | 1.000 | 3.469              | A     | 0.970 | 0.093               | I     | 0.523  |
| Icospiramide        | 2.811             | A     | 0.943 | 0.531              | A     | 0.630 | -0.260              | I     | 0.436  |
| Idoxuridine         | -1.957            | I     | 0.124 | -0.674             | I     | 0.338 | 0.615               | A     | 0.649  |
| Imiclopazine        | 5.731             | A     | 0.997 | -2.919             | I     | 0.051 | -2.689              | I     | 0.064  |
| Ipsapirone          | 7.104             | A     | 0.999 | 3.273              | A     | 0.964 | -0.347              | I     | 0.414  |
| Ketoconazole        | 0.860             | A     | 0.702 | 0.600              | A     | 0.646 | -1.521              | I     | 0.179  |
| Lamotrigine         | 3.384             | A     | 0.967 | -2.853             | I     | 0.055 | 1.952               | A     | 0.876  |
| Levoleucovorin      | 7.082             | A     | 0.999 | 3.271              | A     | 0.963 | 2.234               | A     | 0.903  |
| Mazipredone         | 8.855             | A     | 1.000 | 0.972              | A     | 0.726 | -3.642              | I     | 0.026  |
| Metopimazine        | 1.876             | A     | 0.867 | -2.181             | I     | 0.102 | -3.883              | I     | 0.020  |
| Metoprine           | 3.406             | A     | 0.968 | -0.776             | I     | 0.315 | 1.396               | A     | 0.802  |
| Mycanodin           | -5.291            | I     | 0.005 | -8.099             | I     | 0.000 | 1.119               | A     | 0.754  |
| Naftopidil          | 12.392            | A     | 1.000 | 1.011              | A     | 0.733 | 0.479               | I     | 0.618  |
| Neflumozide         | 8.695             | A     | 1.000 | 1.587              | A     | 0.830 | 1.954               | A     | 0.876  |
| Nicogrelate         | 2.205             | A     | 0.901 | -1.417             | I     | 0.195 | 0.989               | A     | 0.729  |
| Nitramisole         | -2.501            | I     | 0.076 | -1.811             | I     | 0.140 | 4.353               | A     | 0.987  |
| Ocaperidone         | 11.026            | A     | 1.000 | -0.116             | I     | 0.471 | 1.957               | A     | 0.8761 |
| Olinciguat          | 6.699             | A     | 0.999 | 5.706              | A     | 0.997 | 1.141               | A     | 0.758  |
| Oxaflumazine        | 5.551             | A     | 0.996 | 1.595              | A     | 0.832 | -1.515              | I     | 0.180  |
| Oxidized coenzyme A | 8.410             | A     | 1.000 | 3.127              | A     | 0.958 | 1.455               | A     | 0.811  |
| Panipenam           | -4.873            | I     | 0.008 | 2.223              | A     | 0.902 | 1.439               | A     | 0.808  |
| Piretanide          | -5.988            | I     | 0.002 | -2.821             | I     | 0.056 | 2.389               | A     | 0.916  |
| Pyrazofurin         | -2.063            | I     | 0.113 | 2.707              | A     | 0.937 | 0.243               | I     | 0.561  |
| Revospirone         | 6.029             | A     | 0.998 | 2.558              | A     | 0.928 | -0.663              | I     | 0.340  |

|                 |        |   |       |        |   |       |        |   |       |
|-----------------|--------|---|-------|--------|---|-------|--------|---|-------|
| Rofelodine      | -0.550 | I | 0.365 | -2.841 | I | 0.055 | 1.958  | A | 0.876 |
| Rosiglitazone   | 4.135  | A | 0.984 | -0.257 | I | 0.436 | 0.670  | A | 0.662 |
| Sabeluzole      | 5.890  | A | 0.997 | -0.739 | I | 0.323 | -0.695 | I | 0.333 |
| Spiropiperidine | 9.676  | A | 1.000 | -1.428 | I | 0.193 | -0.245 | I | 0.439 |
| Tamsulosin      | 7.407  | A | 0.999 | 1.032  | A | 0.737 | -2.836 | I | 0.055 |
| Tefludazine     | -1.267 | I | 0.219 | 0.889  | A | 0.709 | -2.241 | I | 0.096 |
| Terconazole     | -0.414 | I | 0.397 | 0.158  | A | 0.540 | -0.347 | I | 0.414 |
| Traxanox        | 5.405  | A | 0.996 | -1.883 | I | 0.132 | 3.325  | A | 0.965 |
| Valperinol      | -7.398 | I | 0.001 | 0.791  | A | 0.688 | -0.491 | I | 0.380 |

---

EGCG: Epigallocatechin gallate



**Table S6.** TDP43 inhibitors and decoys from DF<sub>TDP43</sub> training set employed as reference for docking studio.

| Compounds           | PDB:4IUJ         |                                                                                                                               | PDB:4BS2         |                                                                 |
|---------------------|------------------|-------------------------------------------------------------------------------------------------------------------------------|------------------|-----------------------------------------------------------------|
|                     | Binding pocket 1 |                                                                                                                               | Binding pocket 2 |                                                                 |
|                     | Docking score    | Amino acids interacted                                                                                                        | Docking score    | Amino acids interacted                                          |
|                     | Active           |                                                                                                                               |                  |                                                                 |
| Arcyriaflavin A     | -3.472           | Cys145<br>(pi-pi)<br>Asp138<br>(H)                                                                                            | -3.425           | Asp174<br>(H)                                                   |
| Berberine           | <b>-3.999</b>    | <b>Trp113<br/>(pi-pi)</b><br>Phe147<br>(pi-pi)<br>Gly146<br>(aroH x2)<br><b>Arg171<br/>(pi-cation)</b><br>Leu111<br>(aroH x2) | -2.938           | Asp174<br>(salt)<br>Lys176<br>(H)                               |
| Bosutinib           | <b>-2.577</b>    | <b>Trp113<br/>(pi-pi)</b><br><b>Arg171<br/>(pi-cation x2)</b><br>Gly146<br>(aroH)<br>Asp169<br>(H)                            | -3.582           | Tyr123<br>(pi-pi)                                               |
| Furomazine          | -3.649           | Asp138<br>(AroH)<br>Lys145<br>(H)<br>Gly146<br>(H)                                                                            | -3.147           | <b>Cys175<br/>(H)</b><br>Met162<br>(H)                          |
| Ibacinabine         | -3.832           | Asp174<br>(H x2)                                                                                                              | -3.678           | <b>Cys175<br/>(H)</b><br>Cys176<br>(H)                          |
| Idoxuridine         | <b>-3.761</b>    | <b>Trp113<br/>(pi-pi)</b><br><b>Arg171<br/>(pi-cation)</b><br>Leu111<br>(H)                                                   | -3.224           | <b>Cys175<br/>(H)</b><br>Asp174<br>(H)<br>Lys176<br>(pi-cation) |
| IGS-2,7             | <b>-2.196</b>    | Lys145<br>(aroH)<br><b>Arg171<br/>(Hx2, salt)</b>                                                                             | -1.353           | Asp174<br>(aroH)<br>Lys176<br>(H and halogen)                   |
| KPT 335(verdinexor) | <b>-3.107</b>    | <b>Arg171<br/>(pi-pi)</b><br>Asp169<br>(aroH)                                                                                 | -1.887           | Met162<br>(H,aroH)                                              |
| LND-0130436         | <b>-2.394</b>    |                                                                                                                               | -2.572           |                                                                 |

|              |               |                                                                                                                             |        |                                                                              |
|--------------|---------------|-----------------------------------------------------------------------------------------------------------------------------|--------|------------------------------------------------------------------------------|
|              |               | <b>Gly110<br/>(H bond)</b><br>Gly146<br>(aromatic H bond)                                                                   |        | Cys176<br>(halogen)<br>Asp174<br>(H)<br><b>Cys175<br/>(H)</b>                |
| Olomoucine   | <b>-2.38</b>  | <b>Gly110<br/>(pi-pi)<br/>Trp113<br/>(aroH)</b><br>Asp174<br>(H)<br>Leu111<br>(aroH x2)                                     | -2.772 | Arg165<br>(H)<br>Met167<br>(H x2)<br>Asp119<br>(aroH x2)                     |
| Panipenam    | -4.48         | Lys145<br>(H)<br>Lys146<br>(H, aroH)<br>Asp174<br>(H)                                                                       | -5.615 | Hie166<br>(H)<br>Met167<br>(H)<br>Glu122<br>(H, salt)<br>Asp119<br>(H, salt) |
| PHA767491    | <b>-4.621</b> | <b>Trp113<br/>(pi-pi)</b><br>Leu111<br>(AroH)<br>Gly146<br>(AroH)<br><b>Arg171<br/>(pi-cation)</b><br><b>Gly110<br/>(H)</b> | -3.761 | Met162<br>(H)                                                                |
| Pioglitazone | <b>-4.057</b> | <b>Trp113<br/>(pi-pi)<br/>Gly110<br/>(H)<br/>Arg171<br/>(pi-cation)</b><br>Leu111<br>(aroH x2)                              | -1.202 | <b>Cys175<br/>(H)</b><br>Asp174<br>(aroH, H and salt)                        |
| SB 415286    | <b>-3.591</b> | <b>Trp113<br/>(aroH)<br/>Arg171<br/>(salt)<br/>Gly110<br/>(H)</b><br>Asp174<br>(H, aroH)<br>Lys176<br>(halogen)             | -3.85  | -                                                                            |
| SB216763     | <b>-3.536</b> | <b>Gly110<br/>(H)</b>                                                                                                       | -2.92  | Lys176<br>(pi-cation)<br><b>Cys175</b>                                       |

|                                                                                |               |                                                                                                                                                            |        |                                                                           |
|--------------------------------------------------------------------------------|---------------|------------------------------------------------------------------------------------------------------------------------------------------------------------|--------|---------------------------------------------------------------------------|
|                                                                                |               | Lys145<br>(aroH)<br>Gly146<br>(aroH)<br><b>Arg171</b><br><b>(pi-pi)</b><br>Leu111<br>(aroH)                                                                |        | <b>(aroH, halogen)</b><br>Met162<br>(aroH)                                |
| TDP-43                                                                         | <b>-4.742</b> | Phe147<br>(pi-pi)<br>Cys145<br>(aroH)<br><b>Trp113</b><br><b>(pi-pi)</b><br><b>Arg171</b><br><b>(pi-cation)</b><br>Gly146<br>(aroH)<br>Leu111<br>(aroH, H) | -4.127 | Arg165<br>(pi-cation)<br>Asp174<br>(aroH x2 and H)<br>Met162<br>(H, aroH) |
| Tropapride                                                                     | <b>-2.795</b> | Hie143<br>(pi-pi)<br><b>Trp113</b><br><b>(pi-pi x2)</b>                                                                                                    | -3.211 | Met162<br>(H)<br>Asp174<br>(H, aroH and salt)                             |
| Vorinostat                                                                     | <b>-1.138</b> | Lys176<br>(H)<br>Asp174<br>(H)<br><b>Arg171</b><br><b>(pi-cation)</b><br>Gly146<br>(aro H)<br><b>Trp113</b><br><b>(pi-pi)</b><br>Leu111<br>(aroH)          | -0.05  | Met162<br>(H and aroH)<br>Arg165<br>(H)                                   |
| <b>Inactive (or decoys)</b>                                                    |               |                                                                                                                                                            |        |                                                                           |
| 4-carbamoyl-2'-hydroxyiminomethyl-1,1'-oxidimethylenedi(pyridinium) dichloride | -2.998        | Lys176<br>(salt)<br>Gly146<br>(aroH)<br>Leu111<br>(H, aroH)                                                                                                | -3.576 | Glu122<br>(H)<br>Asp119<br>(H, aroH)                                      |
| Amphotericin B                                                                 | -             | -                                                                                                                                                          | -      | -                                                                         |
| Clometacin                                                                     | <b>-4.328</b> | <b>Trp113</b><br><b>(pi-pi)</b><br><b>Gly110</b><br><b>(H)</b><br>Gly146<br>(aroH)<br><b>Arg171</b>                                                        | -2.567 | Lys176<br>(H, salt)<br>Asp174<br>(aroH)<br>Arg165<br>(halogen)            |

|                         |        | (H, salt)                                                                                                     |        |                                                                       |
|-------------------------|--------|---------------------------------------------------------------------------------------------------------------|--------|-----------------------------------------------------------------------|
| Cloxypendyl             | -2.956 | Phe147<br>(pi-pi)<br>Arg165<br>(H x2)<br>Trp172<br>(H)                                                        | -3.175 | Gln182<br>(halogen)<br>Met162<br>(H)<br>Asp174<br>(H)                 |
| Fipronil                | -3.294 | No interact                                                                                                   | -2.867 | Arg165<br>(H)<br>Asp174<br>(H)                                        |
| Flumedroxone-17-acetate | -3.551 | Gly170<br>(H)<br>Lys114<br>(H)                                                                                | -2.758 | Arg165<br>(H)<br>Lys176<br>(H)                                        |
| Fluperamide             | -3.551 | Phe147<br>(pi-pi)<br>Gly146<br>(H, aroH)<br>Leu111<br>(H)<br><b>Trp113<br/>(H)<br/>Arg171<br/>(pi-cation)</b> | -1.869 | Arg165<br>(aroH)                                                      |
| Maduramicin             | -3.5   | Asp169<br>(H)<br><b>Arg171<br/>(H x2,salt)<br/>Gly110<br/>(H)</b>                                             | -      | -                                                                     |
| Metibride               | -2.739 | Phe147<br>(pi-pi)<br><b>Arg171<br/>(H,pi-cation)</b><br>Gly146<br>(aroH)<br>Leu111<br>(aroH)                  | -3.113 | <b>Cys175<br/>(aroH x2)</b><br>Arg165<br>(H x2)<br>Met162<br>(H,aroH) |
| Mizolastine             | -3.173 | <b>Trp113<br/>(pi-pi x3)</b><br>Leu111<br>(aroH)<br><b>Arg171<br/>(pi-cation x2)</b>                          | -2.546 | Asp174<br>(aroH, H,salt)                                              |
| Nelzarabine             | -3.392 | Asp174                                                                                                        | -4.609 | Met162                                                                |

|             |               |                                                                                                                                               |        |                                                                             |
|-------------|---------------|-----------------------------------------------------------------------------------------------------------------------------------------------|--------|-----------------------------------------------------------------------------|
|             |               | (H)<br>Lys176<br>(H)                                                                                                                          |        | (H)<br>Ser163<br>(aroH)<br><b>Cys175</b><br><b>(H)</b><br>Asp174<br>(H)     |
| Oxazafone   | <b>-3.846</b> | Arg165<br>(H)<br>Trp172<br>(H)<br><b>Gly110</b><br><b>(H)</b>                                                                                 | -4.408 | Glu122<br>(aroH)<br>Asp119<br>(H,salt)<br>Asp169<br>(H x2)                  |
| Parconazole | <b>-2.636</b> | Phe147<br>(aroH)<br>Gly146<br>(aroH)<br>Leu111<br>(aroH)<br><b>Arg171</b><br><b>(pi-cation)</b><br><b>Gly110</b><br><b>(H)</b>                | -2.445 | Thr126<br>(H)                                                               |
| Perfomedil  | <b>-3.100</b> | <b>Trp113</b><br><b>(pi-pi, H)</b><br>Ser144<br>(aroH)                                                                                        | -3.775 | Met167<br>(H x2)                                                            |
| Pipobroman  | -2.946        | No interact                                                                                                                                   | -2.919 | Asp169(H)                                                                   |
| Pirifibrate | <b>-3.45</b>  | <b>Arg171</b><br><b>(pi-cation)</b><br><b>Trp113</b><br><b>(pi-pi)</b><br>Leu111<br>(aroH x2)<br>Gly146<br>(aroH)<br>Asp174<br>(H,aroH)       | -3.807 | Asp119<br>(H)<br>Asp169<br>(H)                                              |
| Pivoxazepam | <b>-3.151</b> | <b>Gly110</b><br><b>(H)</b><br><b>Arg171</b><br><b>(pi-cation)</b><br><b>Trp113</b><br><b>(pi-pi)</b><br>Gly146<br>(H)<br>Leu111<br>(aroH x2) | -3.08  | <b>Cys175</b><br><b>(H x2)</b><br>Met162<br>(H)<br>Lys176<br>(pi-cation x2) |
| Sertindole  | -3.663        | Phe147<br>(pi-pi)                                                                                                                             | -3.799 | Asp169<br>(H)                                                               |

|             |               |                                                                                                                        |        |                                                                                              |
|-------------|---------------|------------------------------------------------------------------------------------------------------------------------|--------|----------------------------------------------------------------------------------------------|
|             |               |                                                                                                                        |        | Trp172<br>(pi-pi)<br>Arg165<br>(aroH)                                                        |
| Temelastine | <b>-3.876</b> | Lys176<br>(H)<br><b>Gly110<br/>(H)</b><br>Lys145<br>(H)<br><b>Trp113<br/>(pi-pi)</b>                                   | -2.905 | Arg165<br>(H)<br>Asp174<br>(H x2)                                                            |
| Thioinosine | <b>-4.086</b> | <b>Arg171<br/>(H)</b><br>Trp172<br>(H)<br>Asp174<br>(H)<br>Lys145<br>(H)                                               | -4.38  | <b>Cys175<br/>(H x2)</b><br>Asp174<br>(H, aroH) Met162<br>(H)                                |
| Tiaramide   | <b>-3.326</b> | <b>Trp113<br/>(pi-pi x2)</b><br><b>Arg171<br/>(pi-cation x2, H)</b><br>Leu111<br>(aroH)<br>Asp174<br>(H)               | -3.544 | Asp169<br>(H)<br>Asp119<br>(salt,H)<br>Glu222<br>(salt)<br>His166<br>(salt)                  |
| Tilorone    | <b>-2.643</b> | <b>Trp113<br/>(pi-pi x2)</b><br><b>Arg171<br/>(pi-cation)</b><br>Leu111<br>(aroH)<br>Gly146<br>(aroH)<br>Lys145<br>(H) | -2.709 | Asp174<br>(H,aroH,salt)<br><b>Cys175<br/>(aroH)</b><br>Cys176<br>(pi-pi)<br>Met162<br>(aroH) |
| Uldazepam   | -3.043        | No interac                                                                                                             | -2.879 | Tyr123<br>(pi-pi)<br>Asp119<br>(aroH x2)                                                     |
| Vinconate   | <b>-1.865</b> | <b>Arg171<br/>(pi-cation)</b>                                                                                          | -3.165 | Met162<br>(H)                                                                                |

---

H: H bond interaction; aroH: aromatic H bond; pi-pi interaction; pi-C<sup>+</sup>: pi- cation interaction; salt: salt bridge interaction; halo: halogen bond.
